# Supplementary material for: Ferroptosis-Inhibitory Difference between Chebulagic Acid and Chebulinic Acid Indicates Beneficial Role of HHDP
Source: MDPI journal article supplement (doi:10.3390/molecules26144300), 2021-07-15
Supplement: s1 [file s1]

Supplementary 1. Dose response curves Figures S1–S3

## **Ferroptosis-Inhibitory Difference between Chebulagic Acid and Chebulinic Acid Indicates Beneficial Role of HHDP**

Lin Yang<sup>1</sup>, Yangping Liu<sup>2</sup>, Wenhui Zhang<sup>3</sup>, Yujie Hua<sup>3</sup>, Ban Chen<sup>3</sup>, Quanzhou Wu<sup>3</sup>, Dongfeng Chen<sup>1</sup>, Shuqin Liu<sup>3</sup>, Xican Li<sup>\*3</sup>

1 School of Basic Medical Science, Guangzhou University of Chinese Medicine, Waihuan East Road No. 232, Guangzhou Higher Education Mega Center, Guangzhou, China, 510006.

2 The Fourth Clinical Medical College, Guangzhou University of Chinese Medicine, Waihuan East Road No. 232, Guangzhou Higher Education Mega Center, Guangzhou, China, 510006.

3 School of Chinese Herbal Medicine, Guangzhou University of Chinese Medicine, Guangzhou, China, 510006.

\* Correspondence: lixc@gzucm.edu.cn (X.L.); Tel: +86-20-39358076; Fax: +86-20-38892690

**Note:** This Supporting information provides the original data of **Table 1** in the main text. All data marked with an asterisk (\*) are mentioned in **Table 1** in the main text.

# 1. PTIO•-inhibition assay

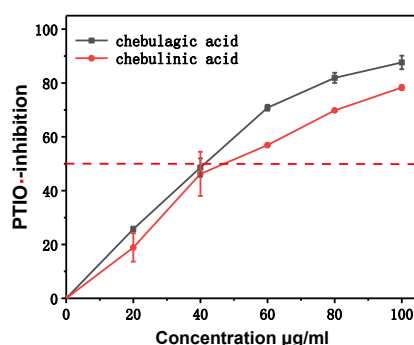

Figure S1a: The dose response curves of chebulagic acid and chebulinic acid in PTIO•-inhibition assay (pH7.4). Each value is expressed as mean  $\pm$  SD (n = 3).

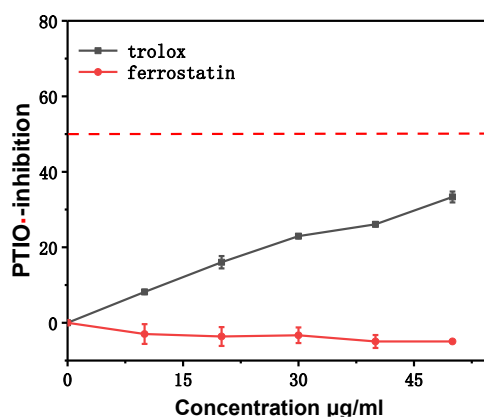

Figure S1b: The dose response curves of Trolox, and Ferrostatin-1 in PTIO•-inhibition assay (pH7.4). Each value is expressed as mean  $\pm$  SD (n = 3).

Table S1. The comparison of IC<sub>50</sub> values of chebulagic acid, chebulinic acid, and positive controls in PTIO•-inhibition assay (pH7.4).

|                 | Mean $\pm$ SD<br>$\mu$ g/mL | Mean $\pm$ SD<br>$\mu$ M |
|-----------------|-----------------------------|--------------------------|
| chebulagic acid | 43.5 $\pm$ 1.6              | 40.1 $\pm$ 1.5*          |
| chebulinic acid | 54.0 $\pm$ 4.7              | 56.4 $\pm$ 5.0*          |
| Trolox          | 77.7 $\pm$ 3.7              | 310.3 $\pm$ 14.8*        |
| Ferrostatin-1   | n.d.                        | n.d.*                    |

IC<sub>50</sub> value was defined as the concentration of 50% superoxide anion radical inhibition, and calculated by linear regression which was analyzed by Origin 6.0 professional software. All data marked with an asterisk (\*) are mentioned in **Table 1** in the main text.

## 2. $Fe^{3+}$ -reducing antioxidant power (FRAP) assay

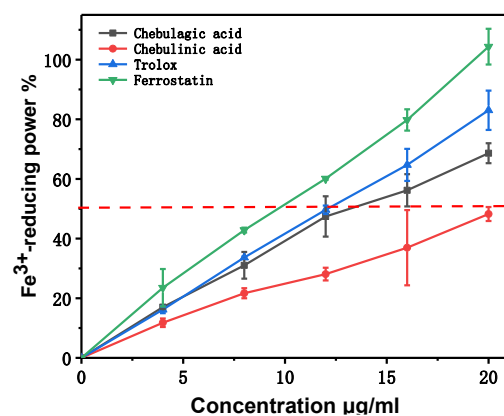

Figure S2: The dose response curves of chebulagic acid, chebulinic acid, Trolox, and Ferrostatin-1 in FRAP assays. Each value is expressed as mean  $\pm$  SD (n = 3).

Table S2. The comparison of  $IC_{50}$  values of chebulagic acid, chebulinic acid, and positive controls in FRAP assay.

|                 | Mean $\pm$ SD<br>$\mu$ g/mL | Mean $\pm$ SD<br>$\mu$ M |
|-----------------|-----------------------------|--------------------------|
| chebulagic acid | 13.9 $\pm$ 1.2              | 14.4 $\pm$ 0.1*          |
| Tannic acid     | 21.4 $\pm$ 2.2              | 12.8 $\pm$ 1.1*          |
| Trolox          | 12.2 $\pm$ 0.6              | 48.7 $\pm$ 2.5*          |
| Ferrostatin-1   | 9.5 $\pm$ 0.4               | 36.3 $\pm$ 1.5*          |

$IC_{50}$  value was defined as the concentration of 50% superoxide anion radical inhibition, and calculated by linear regression which was analyzed by Origin 6.0 professional software. All data marked with an asterisk (\*) are mentioned in **Table 1** in the main text.

### 3. DPPH•-inhibition assay

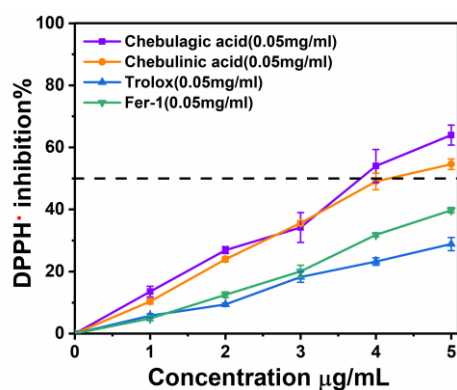

Figure S3: The dose response curves of chebulagic acid, chebulinic acid, Trolox, and Fer-1 in DPPH•-inhibition assay. Each value is expressed as mean  $\pm$  SD (n = 3).

Table S3. The comparison of IC<sub>50</sub> values of chebulagic acid, chebulinic acid and positive control in DPPH•-inhibition assay.

|                 | Mean $\pm$ SD<br>$\mu$ g/mL | Mean $\pm$ SD<br>$\mu$ M |
|-----------------|-----------------------------|--------------------------|
| Chebulagic acid | 3.8 $\pm$ 0.1               | 4.0 $\pm$ 0.1*           |
| Chebulinic acid | 4.3 $\pm$ 0.4               | 4.5 $\pm$ 0.4*           |
| Trolox          | 8.7 $\pm$ 1.2               | 34.9 $\pm$ 4.9*          |
| Fer-1           | 6.2 $\pm$ 0.2               | 23.5 $\pm$ 0.7*          |

IC<sub>50</sub> value was defined as the concentration of 50% superoxide anion radical inhibition and calculated by linear regression which was analyzed by Origin 6.0 professional software. Fer-1, Ferrostatin-1. All data marked with an asterisk (\*) are mentioned in **Table 1** in the main text.

#### 4. ABTS•-inhibition assay

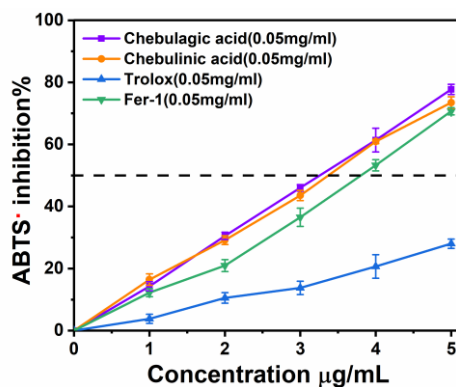

Figure S4: The dose response curves of chebulagic acid, chebulinic acid, Trolox, and Fer-1 in ABTS•-inhibition assay. Each value is expressed as mean  $\pm$  SD (n = 3).

Table S4. The comparison of IC<sub>50</sub> values of chebulagic acid, chebulinic acid and positive control in ABTS•-inhibition assay.

|                 | Mean $\pm$ SD<br>$\mu$ g/mL | Mean $\pm$ SD<br>$\mu$ M |
|-----------------|-----------------------------|--------------------------|
| Chebulagic acid | 3.3 $\pm$ 0.0               | 3.4 $\pm$ 0.0*           |
| Chebulinic acid | 3.4 $\pm$ 0.1               | 3.5 $\pm$ 0.1*           |
| Trolox          | 8.9 $\pm$ 0.2               | 35.7 $\pm$ 0.8*          |
| Fer-1           | 3.9 $\pm$ 0.2               | 14.9 $\pm$ 0.8*          |

IC<sub>50</sub> value was defined as the concentration of 50% superoxide anion radical inhibition and calculated by linear regression which was analyzed by Origin 6.0 professional software. Fer-1, Ferrostatin-1. All data marked with an asterisk (\*) are mentioned in **Table 1** in the main text.
